# Supplementary material for: A lasered mouse model of retinal degeneration displays progressive outer retinal pathology providing insights into early geographic atrophy
Source: PubMed Central journal article supplement (PMC6522499; doi:10.1038/s41598-019-43906-z), 2019-05-16
Supplement: 41598_2019_43906_MOESM1_ESM.pdf [file 41598_2019_43906_MOESM1_ESM.pdf]

**Title:** A lasered mouse model of retinal degeneration displays progressive outer retinal pathology providing insights into early geographic atrophy.

**Authors:** Paul Ibbett<sup>a,†</sup>, Srinivas V. Goverdhan<sup>b,c,†</sup>, Elena Pipi<sup>a</sup>, Joe K. Chouhan<sup>a</sup>, Eloise Keeling<sup>b</sup>, Elizabeth M. Angus<sup>d</sup>, Jenny A. Scott<sup>b</sup>, Maureen Gatherer<sup>b</sup>, Anton Page<sup>d</sup>, Jessica L. Teeling<sup>a</sup>, Andrew J. Lotery<sup>b,c,\*</sup>, J. Arjuna Ratnayaka<sup>b,\*</sup>.

**Affiliations:**

a: Biological Sciences, University of Southampton, SGH, South Lab and Path Block, MP840, Tremona Road, Southampton, SO16 6YD, United Kingdom.

b: Clinical and Experimental Sciences, Faculty of Medicine, University of Southampton, MP806, Tremona Road, Southampton SO16 6YD, United Kingdom.

c: Eye Unit, University Hospital Southampton NHS Foundation Trust, Southampton, SO16 6YD, United Kingdom.

d: Biomedical Imaging Unit, University of Southampton, MP12, Tremona Road, Southampton SO16 6YD, United Kingdom.

† Contributed equally to this work (joint first authors)

\* Corresponding authors: J. Arjuna Ratnayaka and Andrew J. Lotery.

J. Arjuna Ratnayaka: Clinical and Experimental Sciences, Faculty of Medicine, University of Southampton, MP806, Tremona Road, Southampton SO16 6YD, United Kingdom. Tel: +044 238120 8183, Email: [J.Ratnayaka@soton.ac.uk](mailto:J.Ratnayaka@soton.ac.uk)

Andrew J. Lotery: Clinical and Experimental Sciences, Faculty of Medicine, University of Southampton, MP806, Tremona Road, Southampton SO16 6YD, United Kingdom. Tel: +044 238120 5049, Email: [A.J.Lotery@soton.ac.uk](mailto:A.J.Lotery@soton.ac.uk)

## Supplementary information (figures and tables)

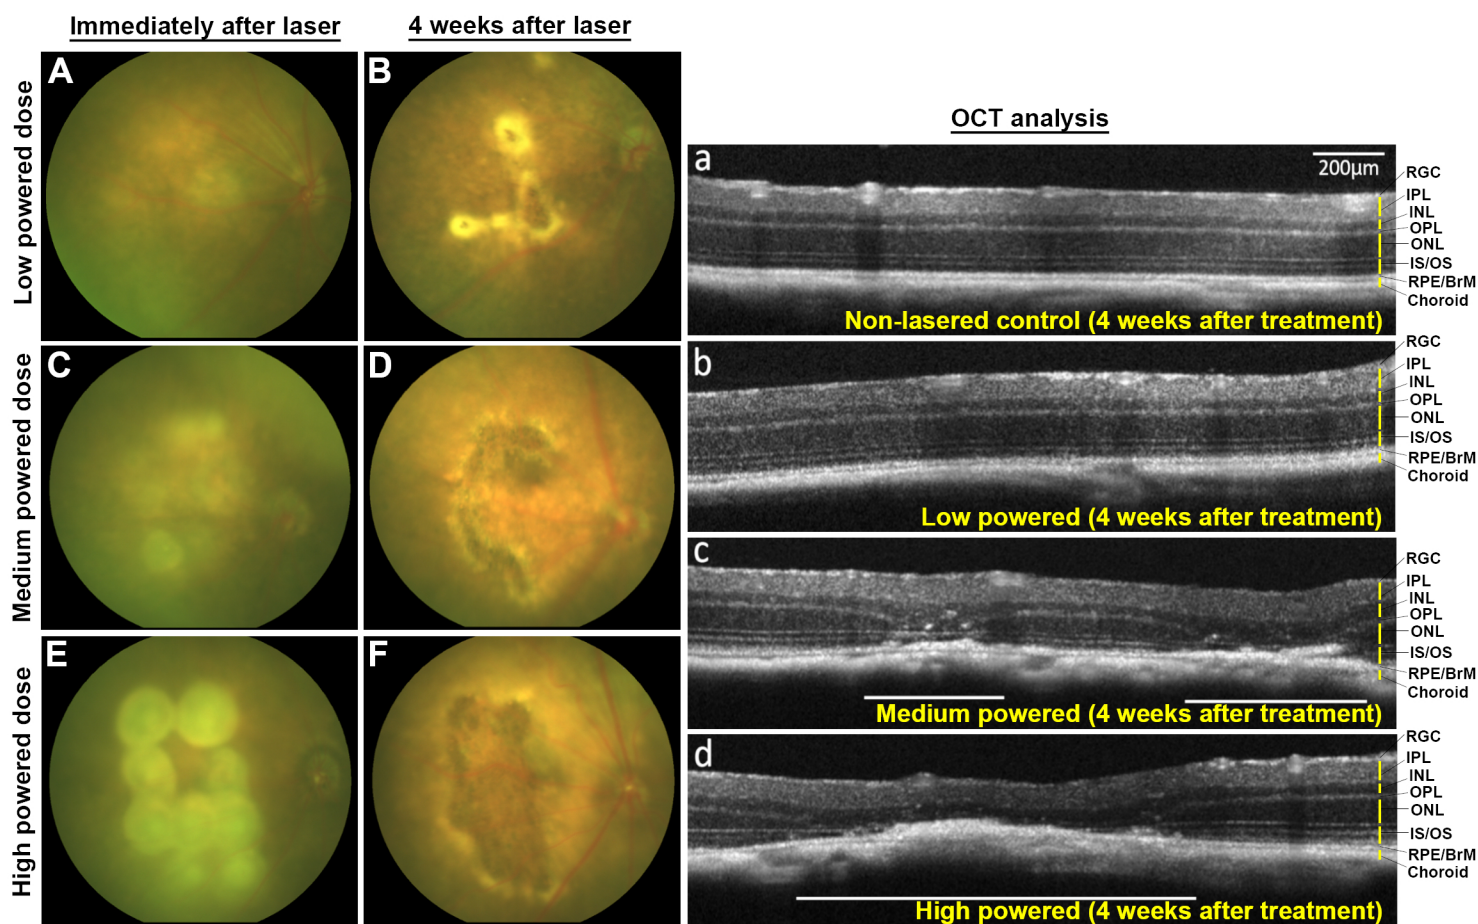

**Figure S1: Optimisation of laser treatment.** Multiple and adjacent areas of each retina were targeted with either [A,B,b] a low-powered (22mW, 60s), [C,D,c] medium-powered (32mW, 60s) or [E,F,d] a high-powered (42mW, 60s) laser (n=6 mice/group, 5 month old mice). Development of lesions were assessed by funduscopy and longitudinal OCT. [A-F] Representative funduscopy images showing formation of lesions immediately after laser treatment and following 4 weeks. Treatment with a low-powered laser failed to cause atrophic lesions after 4 weeks with any reproducibility, except on rare occasions. By contrast, a medium-powered laser resulted in consistently generating lesions after 4 weeks. A high powered-laser caused the rapid development of a confluent lesion, but also damage to the overlying neuroretina. Discernable areas of the lesions in OCT images are indicated by a white line.

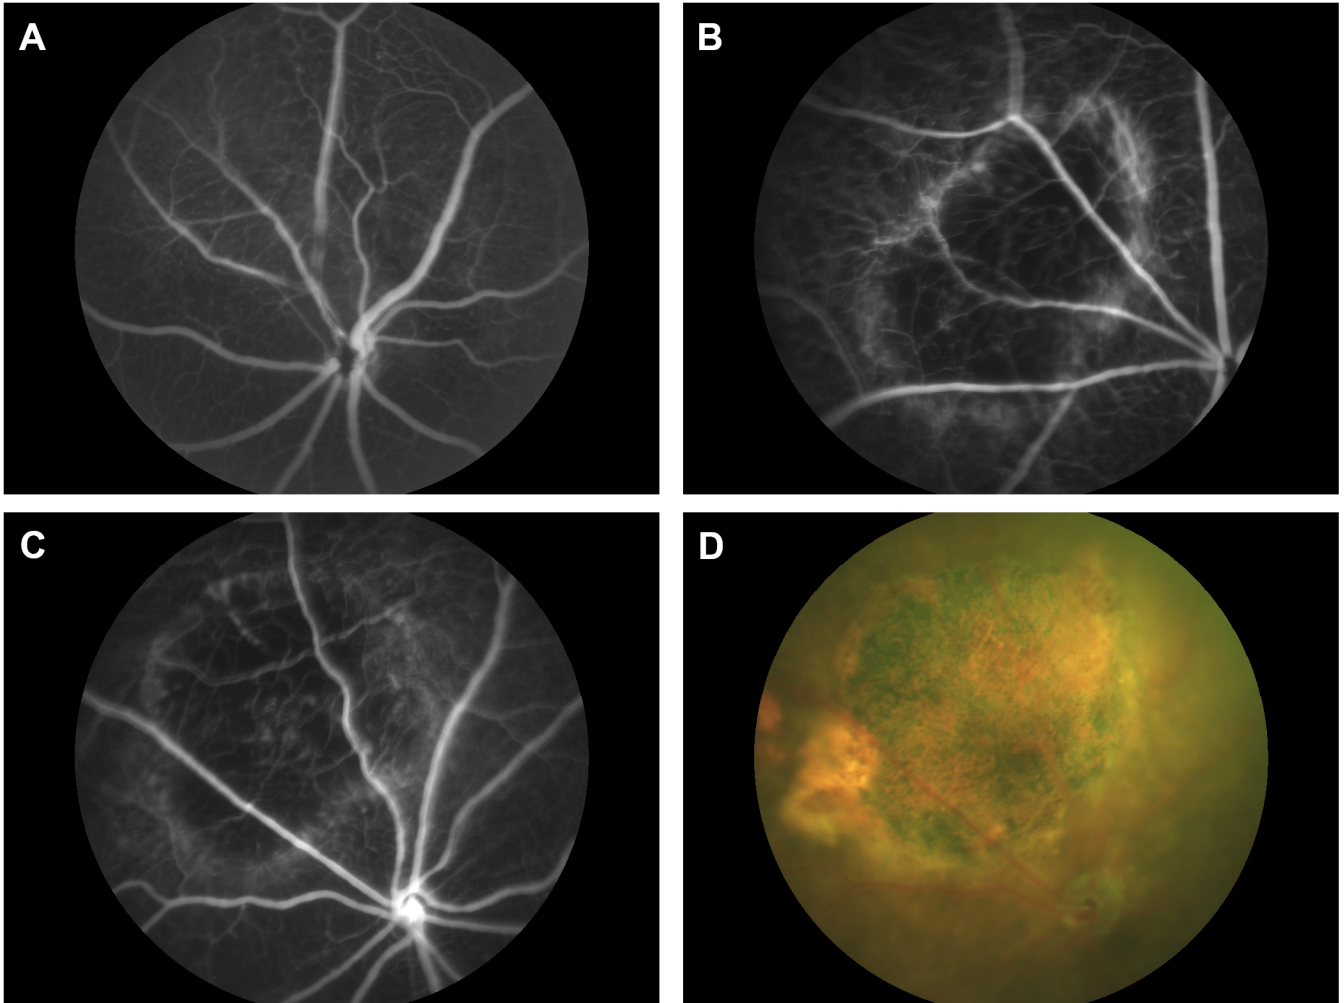

**Figure S2:** Fluorescein angiography (FA) was performed to assess potential breaks in the blood-retinal barrier. Representative FA performed in 13 month old mice showing [A] a healthy non-lasered retina and [B] a retina 8 weeks after laser treatment. [C] Lasered eye and [D] colour fundus photograph (CFP) showing lesion with well-defined borders and visible choroidal vessels. Notice the hyperfluorescent marginal zone of lesions. There was no evidence of dye leakage.

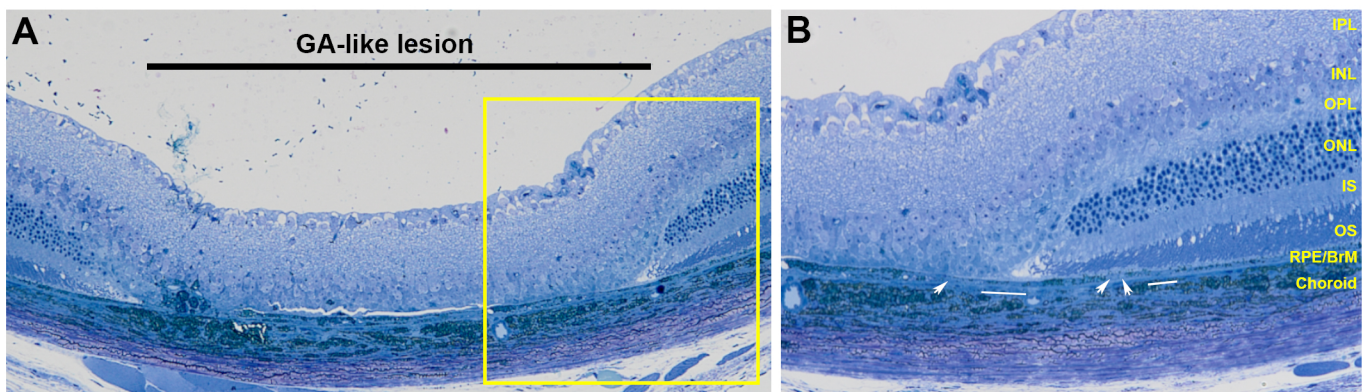

**Figure S3: Semi-thin light microscopy sections showing GA-like lesions.** [A] Mouse eyes 3 months after laser treatment shows a characteristic lesion where the photoreceptor layer had been obliterated. [B] Inset shows the RPE monolayer to be intact, although some areas of thinning (white bars) was evident. Areas of hypo-pigmented RPE (white arrows) can also be observed.

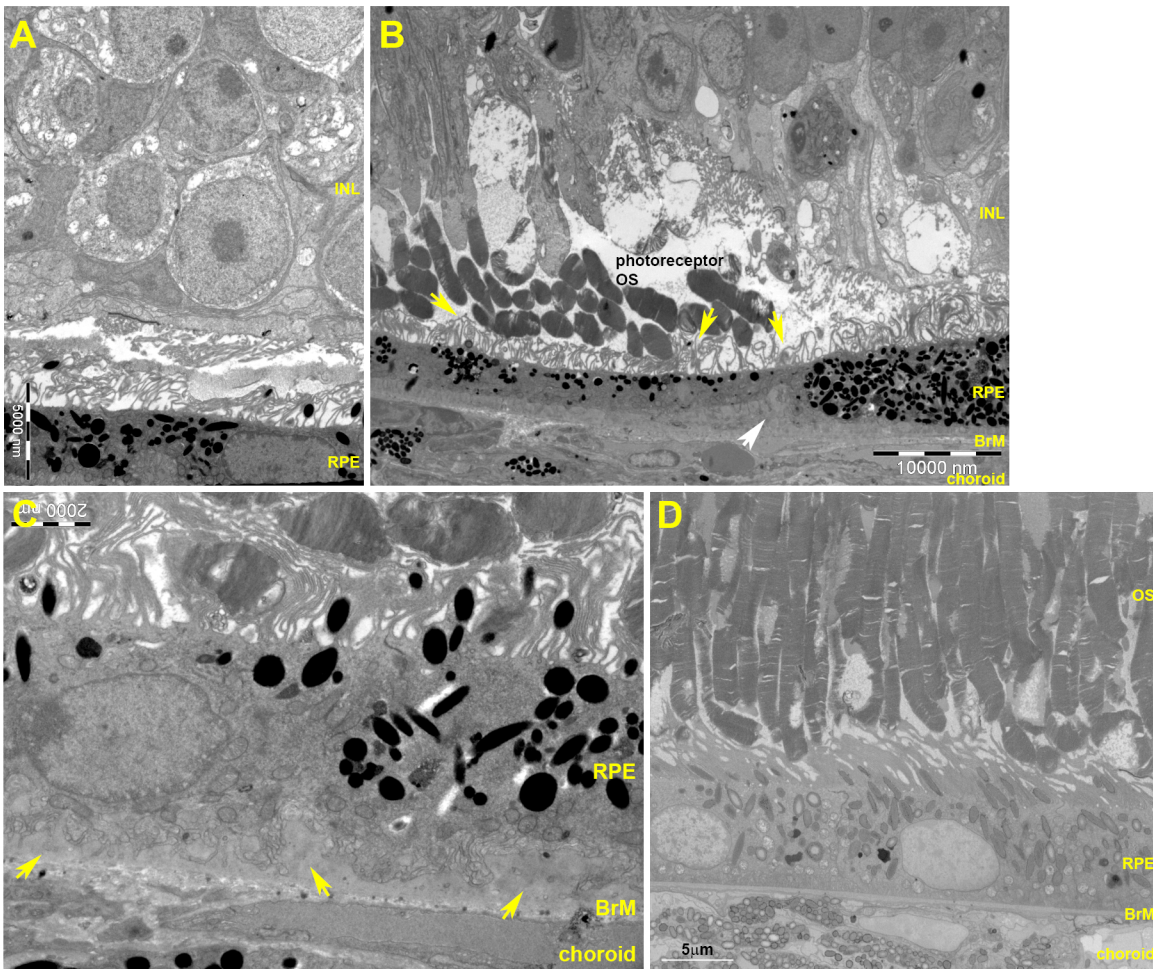

**Figure S4: Ultrastructural abnormalities within GA-like lesions in tissues of the outer retina.** Mouse eyes were assessed by TEM three months after laser treatment. [A] Representative electron micrograph showing an intact RPE monolayer on to which the INL had collapsed in the absence of photoreceptors within lasered spots. Disorganised microvilli on the apical RPE surface were also visible amongst debris. [B] Micrograph showing debris within lesions, some of which can be recognised as POS overlying the RPE. Areas where microvilli had become shortened and disorganised are indicated by yellow arrows. The RPE monolayer was intact although hypo and hyper-pigmented cells were evident. In some areas, we also observed an unusual thickening of BrM (white arrow). [C] A high-powered electron micrograph showing highly invaginated basal infolds of the RPE corresponding to thickened BrM (yellow arrows) within lasered spots. [D] Non-lasered mouse eye showing normal histology of the outer retina.

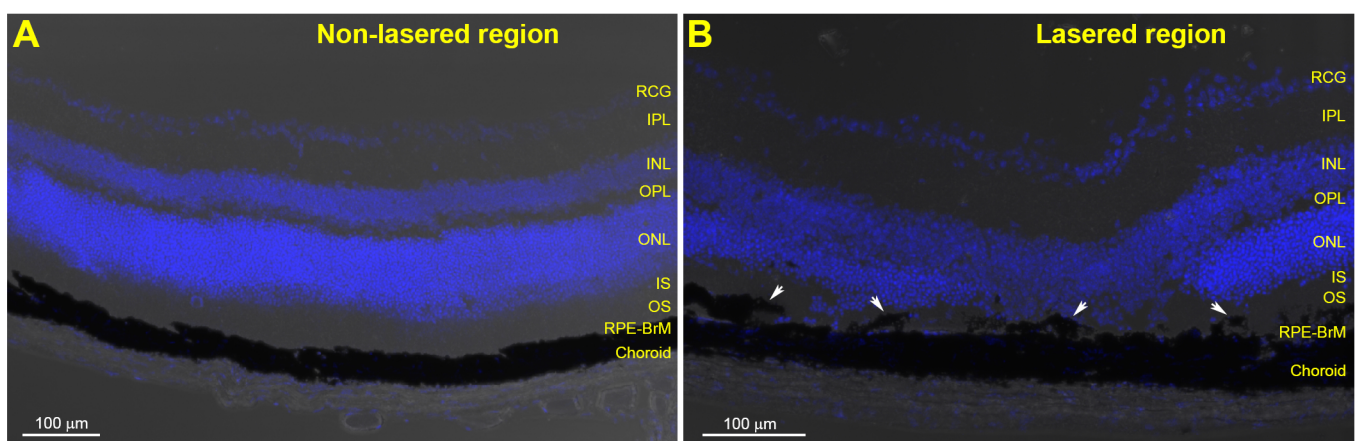

**Figure S5: Chronic inflammation in lesions are associated with abnormal RPE.** Corresponding brightfield images of confocal immunofluorescence panels in figure 3E and 3F. [A] Non-lasered vs. [B] lasered spot showing evidence of abnormal/hyperplastic RPE (white arrows in B). DAPI nuclear staining is shown in blue. Scale bar corresponds to 100 μm.

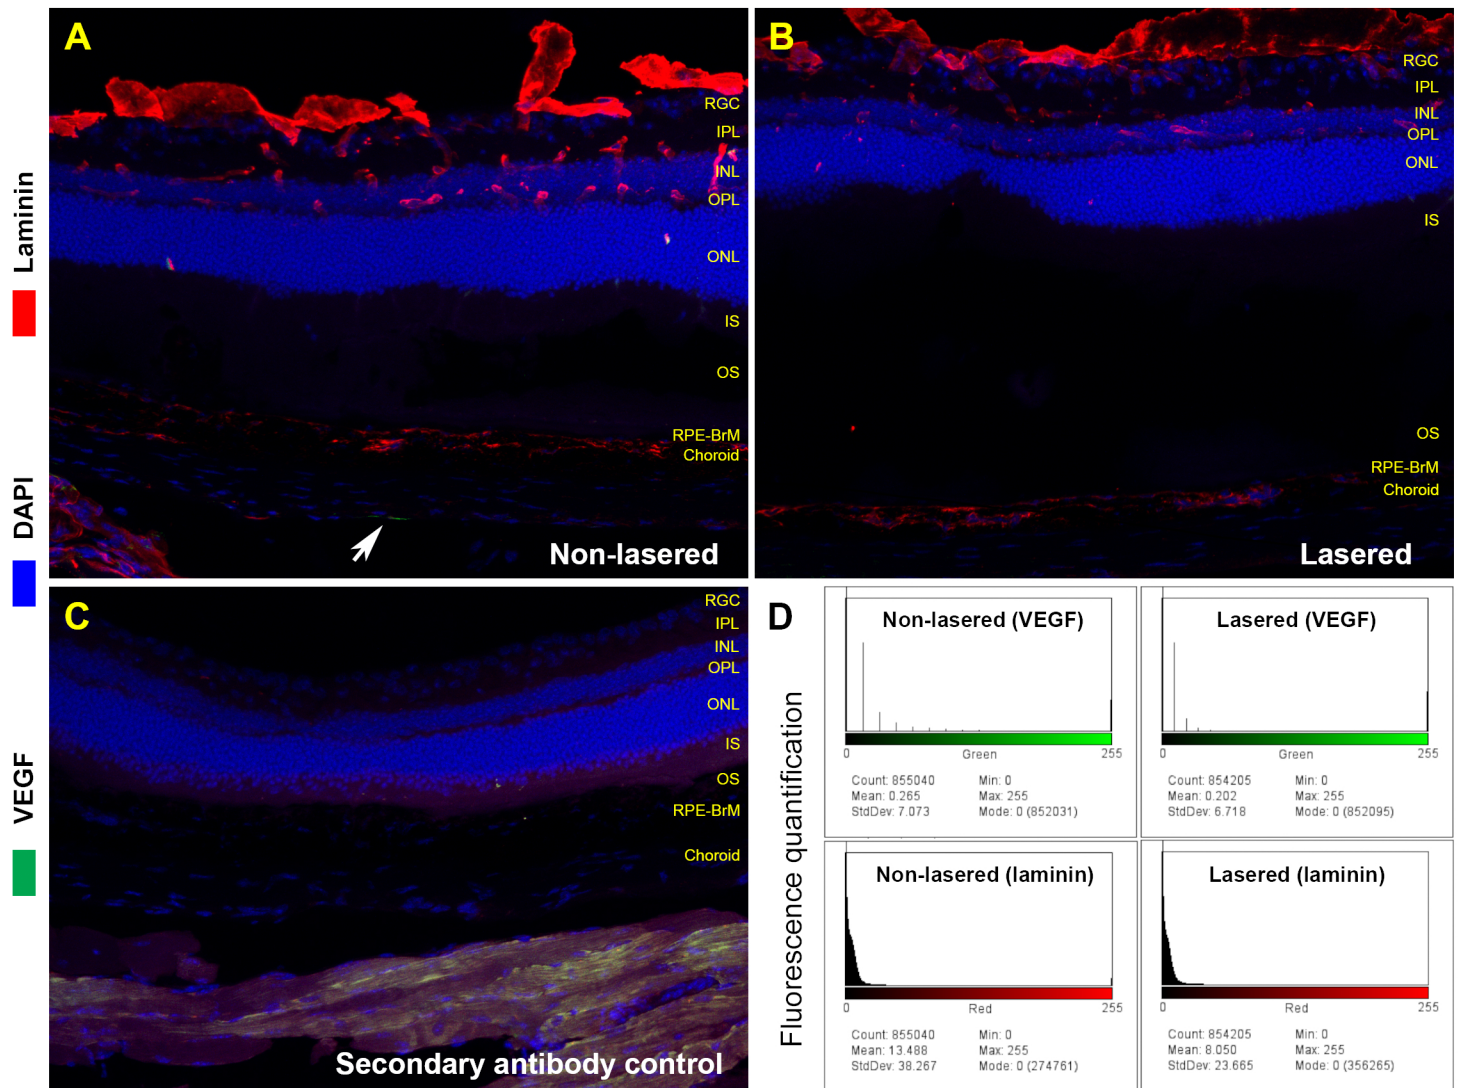

**Figure S6: Comparison of VEGF levels in lasered mouse retinas after 4 weeks.** The expression of vascular endothelial growth factor (VEGF), an indicator of angiogenesis and choroidal neovascularisation (green, and indicated by an arrow) and the blood vessel marker laminin (red) was assessed between [A] non-lasered and [B] lasered areas in mouse retinas. Although some detachment of the retina had occurred during tissue processing, GA-like lesions could be identified by the presence of a collapsed retinal layer. We found no evidence of VEGF upregulation in lasered sites above baseline expression in nearby non-lasered tissues. Laminin staining indicate retinal/choroidal vessels, which also showed no evidence of any neovascularisation at lasered sites. [C] A confocal-immunofluorescence image of secondary antibody only control tissue is shown alongside. Nuclei were stained with DAPI (blue). [D] We also measured the fluorescence levels of VEGF and laminin in non-lasered and lasered sites. The x axis represents fluorescence values and the y axis shows the number of pixels for each channel. The total pixel counts for each channel (VEGF: green and Laminin: red) in the whole field is shown as mean, modal, minimum and maximum fluorescence values. This quantification confirmed lack of VEGF upregulation or increased laminin expression (vessel proliferation) in lasered sites compared to adjacent non-lasered tissues in the GA-like mouse model.

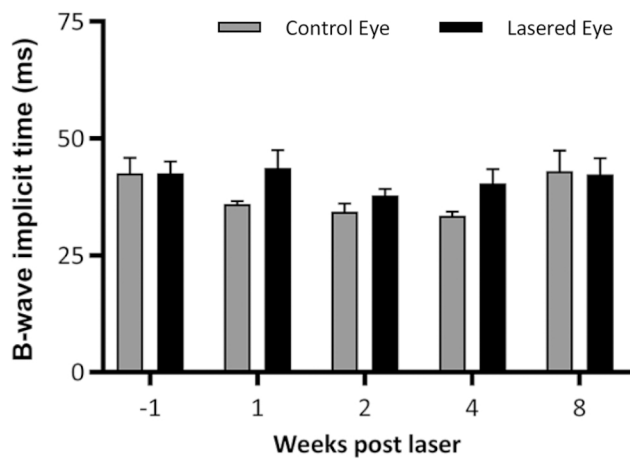

**Figure S7: B-wave implicit times show no change between successive weeks in lasered eyes.** Data analysed using two-way ANOVA followed by Holm-Sidak post-hoc testing.

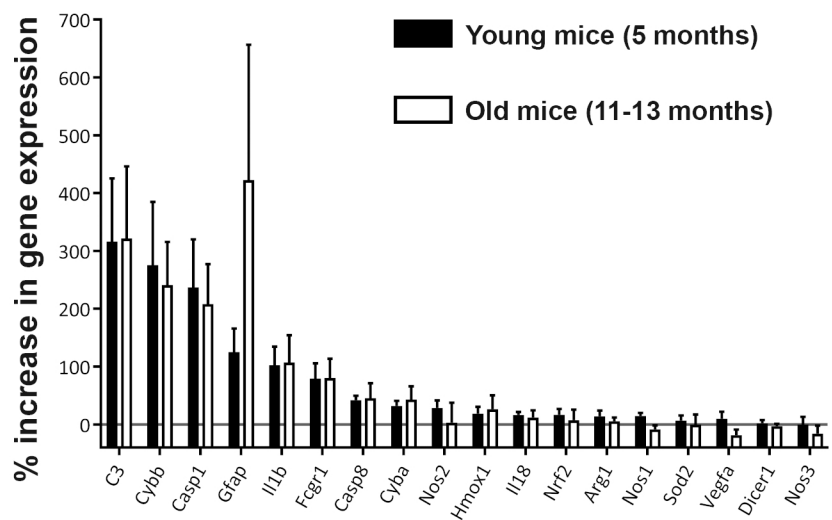

**Figure S8: Comparison of mRNA profiles between young and old lasered eyes showed no significant differences.** Data analysed using multiple paired one-tailed t-tests followed by Holm-Sidak multiple comparisons correction.

|                             | Minimum | Maximum | Optimum |
|-----------------------------|---------|---------|---------|
| Primer length (bp)          | 15      | 25      | 20      |
| Melting temperature (°C)    | 57      | 63      | 60      |
| Max 5' self-complementarity | 0       | 7       | 0       |
| Max 3' self-complementarity | 0       | 3       | 3       |
| GC content (%)              | 35      | 65      | 50      |
| PCR product size (bp)       | 70      | 300     | -       |

**Table S1: Summary of primer conditions.** Criteria used during primer design using Primer-BLAST (NCBI). Where possible, one primer of each pair recognised an exon-exon boundary to prevent the amplification of genomic DNA.

| Gene   | Gene ID | Common aliases | Fwd 5'-3'            | Rev 5'-3'             | Efficiency |
|--------|---------|----------------|----------------------|-----------------------|------------|
| Arg1   | 11846   |                | ACAAGACAGGGCTCTTTCAG | CTTGGGAGGAGAAGCGTTT   | 99%        |
| C3     | 12266   |                | CAACAACCAACAGCGCATCT | AACTGGGCAGCAGTATTC    | 95%        |
| Casp1  | 12362   |                | AGGCCAGGACCTATGTGAT  | AGCTGATGGAGCTGATTGAAG | 119%       |
| Casp8  | 12370   |                | AGCACAGAGAGAATGAGCC  | TTGGCGAGTCACACAGTTC   | 103%       |
| Cyb-a  | 13057   | p22phox        | TGGCTGATTCATCACTGG   | TAGAGTAGGCGCGAAATACC  | 87%        |
| Cybb   | 13058   | Nox2, gp91phox | GCTGAAAACCTCTACTACT  | GCCAAAACCGAAACCTC     | 98%        |
| Dicer1 | 192119  |                | ACATGACGAGGAGAGACCA  | ACTCTGGAATTGCTTGGGT   | 87%        |
| Fcgr1  | 14129   | CD64, FcγRI    | TACTTTGGGTTCCAGTGGT  | CCTGATTTCGCACTGTCT    | 103%       |
| Gapdh  | 14433   |                | TGAAGGGGAAGCTCACTGG  | TCCACCCTCTTTCGTGA     | 115%       |
| Gfap   | 14580   |                | AGTGGTTCGGTCTAAGTTGC | GACTCCAGATGGCGTCAA    | 104%       |
| Hmox1  | 15368   | HO-1           | GCTAGCTGGTCAAGATAC   | TGGGGCCAGTATTGCATT    | 112%       |
| Il1b   | 16176   |                | CAAAAGATGAAGGCTGCTTC | ATGTGCTCTGGAGATTG     | 141%       |
| Il18   | 16173   |                | TCAAAGTCCAGTGAACCC   | GTCAAGCCAGTCTCTACT    | 110%       |
| Nfe2l2 | 18024   | NRF2           | GGTTGCCACATCCCAAC    | GCAAGCACTATGGTCATC    | 100%       |
| Nos1   | 18125   | nNOS           | AGAGGAAGACTACAAGTCC  | GGCGAAGACTGAGAACCCTC  | 90%        |
| Nos2   | 18126   | iNOS           | ATGCCCAACAATGGCAAC   | TAGTGTGATGCACACTGGG   | 103%       |
| Nos3   | 18127   | eNOS           | CCGGAGATGGAGAGACTT   | CAGAAAGTGGGGTATGCTCG  | 115%       |
| Sod2   | 20656   | MnSOD          | GAAACAATCTCAACCCAC   | CCAGCAACTCTCTTGGGTT   | 104%       |
| Vegfa  | 22339   |                | GATCCGACAGGTGAATGTT  | TCACCCTCGGCTGTGCAT    | 99%        |

**Table S3: Efficiencies of primers used for mRNA analysis.** 1:5 serial dilution of retinal cDNA (neat to 1:625) run with individual primers and expression measured by qPCR under the same conditions as described in methods. Data analysed by plotting on a linear scale with log (DNA copy number) on the x axis and threshold Ct value on the y axis. Slope of the linear trendline was calculated and used to establish efficiency using the following equation:  $E = (-10^{(-1/\text{slope})} - 1) * 100$

| Gene   | Gene ID | Common aliases | Forward primer 5'-3'     | Reverse primer 5'-3'     |
|--------|---------|----------------|--------------------------|--------------------------|
| Arg1   | 11846   |                | ACAAGACAGGGCTCCTTTCAG    | CTTGGGAGGAGAA GGCGTTT    |
| C3     | 12266   |                | CAACAACCAACACG GCA TCT   | AACTGGGCAGCAC GTA TTCC   |
| Casp-1 | 12362   |                | AGGCCAGGGACCTA TGTGAT    | AGCTGA TGGAGCT GA TTGAAG |
| Casp-8 | 12370   |                | AGCACAGAGAGAA GAA TGAGCC | TTGGCGAGTCACA CAGTTCC    |
| Cyb-a  | 13057   | p22phox        | TGGCTGATTCCTCA TCACTGG   | TAGAGTAGGCGCC GAAA TACC  |
| Cyb-b  | 13058   | Nox2, gp91phox | GCTGGAAACCCCTCT A TGACTT | GCCAAAACCGAAC CAACCTC    |
| Dicer1 | 192119  |                | ACA TGACGAGGAGG AGACCA   | ACTCTGGAATTGCT TTGGGT    |
| FcγRI  | 14129   | CD64, FcγRI    | TACTTTGGGTTCCAG TCGGT    | CCTGTATTGCGCAC TGTCCT    |
| GAPDH  | 14433   |                | TGAACGGGAAGCTC ACTGG     | TCCACCACCTGTG TCTGTA     |
| GFAP   | 14580   |                | AGTGGTATCGGTCTA AGTTTGC  | GACTCCAGA TCGC AAGTCAA   |
| Hmox1  | 15368   | HO-1           | GCTAGCTGGTGCAA GATAC     | TGGGGCCAGTAT TGCA TTT    |
| IL-1β  | 16176   |                | CAAAAGA TGAA GGG CTGCTTC | ATGTGCTGCTGCGA GATTTG    |
| IL-18  | 16173   |                | TCAAAGTGCCAGTGA ACCC     | GTCAAGCCAGTCT CTCTTACT   |
| Nfe2l2 | 18024   | NRF2           | GGTTGCCACATTC CAAAC      | GCAAGCGACTCA TGGTCA TC   |
| Nos1   | 18125   | nNOS           | AGAGGAAGAGCTAC AAGTCC    | GGCCGAAGACTGA GAACCTC    |
| Nos2   | 18126   | iNOS           | ATGCCCAACAATG GCAAC      | TAGTTCGATGCAC AACTGGG    |
| Nos3   | 18127   | eNOS           | CCGGAGAA TGGAGA GAGCTT   | CAGAAAGTGGGGT ATGTCTCG   |
| SOD2   | 20656   | MnSOD          | GAAACA TCTCAACGC CACCG   | CCAGCAACTCTCT TGGGTT     |
| VEGF-A | 22339   |                | GATCCGACAGCGTGT AAATGTT  | TCAACCCTCGGCT TGTCACAT   |

**Table S2: List of primers used for mRNA analysis.**
